# Supplementary material for: An insight, at the atomic level, into the structure and catalytic properties of the isomers of the Cu22 cluster
Source: Royal Society of Chemistry journal article supplement (doi:10.1039/d4nr00973h), 2024-01-01
Supplement: d4nr00973h1.pdf [file d4nr00973h1.pdf]

# An insight, at the atomic level, into the structure and catalytic properties of the isomer Cu<sub>22</sub> cluster

Huimin Zhou,<sup>‡,a</sup> Tao Yang,<sup>‡,a</sup> Huijuan Deng,<sup>‡,a</sup> Yapei Yun,<sup>a</sup> Shan Jin,<sup>\*,a</sup> Lin Xiong,<sup>\*,b</sup> Manzhou Zhu<sup>\*,a</sup>

a. Key Laboratory of Structure and Functional Regulation of Hybrid Materials, Anhui University, Ministry of Education, Institutes of Physical Science and Information Technology, Anhui University, Department of Chemistry and Center for Atomic Engineering of Advanced Materials, Anhui University, Hefei, Anhui 230601, P. R. China.

b. School of Food and Chemical Engineering, Shaoyang University, Shaoyang 422000, PR China

## 1.1 Chemicals Materials

Copper tetraacetonitrile tetrafluoroborate (Cu(CH<sub>3</sub>CN)<sub>4</sub>·BF<sub>4</sub>), 98.3%, Sigma-Aldrich), tris (4-fluorophenyl) phosphine ((P(Ph-<sup>4</sup>F)<sub>3</sub>), 99.7 % , Sigma-Aldrich), phenylselenol (C<sub>6</sub>H<sub>5</sub>SeH, 96 % , Sigma-Aldrich), sodium borohydride (NaBH<sub>4</sub>, 98%, Sigma-Aldrich), acetonitrile ( CH<sub>3</sub>CN, HPLC, Aldrich), chloroform ( CHCl<sub>3</sub>, HPLC grade, Aldrich ) n-hexane (Hex, HPLC grade, Aldrich), dichloromethane (CH<sub>2</sub>Cl<sub>2</sub>, HPLC grade, Aldrich). All reagents were used as received without further purification.

## 1.2 The synthesis of isomer Cu<sub>22</sub> clusters

Typically, copper salt (Cu(CH<sub>3</sub>CN)<sub>4</sub>·BF<sub>4</sub>, 160 mg, 0.51 mmol) was added to the mixed solution of 5ml acetonitrile and 5ml chloroform under vigorous stirring. After 10 mins, tris (4-fluorophenyl) phosphine (P(Ph-<sup>4</sup>F)<sub>3</sub>), 116 mg, 0.367mmol) and phenylselenol (C<sub>6</sub>H<sub>5</sub>SeH, 23μl, 0.146 mmol) were added together to the mixed solution. After 15 min, a freshly prepared solution of sodium borohydride (60 mg, in 2 ml CH<sub>3</sub>OH) was added. The reaction lasted for 4h at room temperature. The crude product was obtained by removing the excess solution with a rotary evaporator. The isomers Cu<sub>22</sub>(SePh)<sub>10</sub>(Se)<sub>6</sub>((P(Ph-<sup>4</sup>F)<sub>3</sub>)<sub>8</sub>) were crystallized in a mixture of CH<sub>2</sub>Cl<sub>2</sub> and n-hexane at room temperature for 2 weeks. Black block and yellow flake crystals were observed, which were identified as Cu<sub>22</sub>-1 and Cu<sub>22</sub>-2, respectively.

## 1.3 Characterization

X-ray photoelectron spectroscopy (XPS) measurements were performed on a Thermo ESCALAB 250 configured with a mono chromated AlKα (1486.8 eV) 150W X-ray source, 0.5 mm circular spot size, a flood gun to counter charging effects, and the analysis chamber base pressure lower than 1 x 10<sup>-9</sup> mbar, data were collected with FAT= 20 eV. X-ray diffraction. X-ray diffraction (XRD) data for **Cu<sub>22</sub>-1** and **Cu<sub>22</sub>-2** crystals were collected using Bruker D8 Advance diffractometer (Cu Kα). PXRD patterns of samples were collected at room temperature in air on a X'Pert PRO diffractometer (Cu-Kα). The element analysis was performed on Vario EL cube. 3 mg of each sample was used in the experiment.

## 1.4 X-Ray Crystallography

The data collections for single crystal X-ray diffraction were carried out on a Bruker Smart APEX II CCD diffractometer, using a Cu-K radiation (λ=1.5418 Å). Data reductions and absorption corrections were performed using the SAINT and SADABS programs, respectively. The structure was solved by direct methods and refined with full-matrix least squares on F<sup>2</sup> using the SHELXTL software package. All non-hydrogen atoms were refined anisotropically, and all the hydrogen atoms were set in geometrically calculated positions and refined isotropically using a riding model.

## 1.5 Computational methods and details

Optimization of the geometric structures of Cu<sub>22</sub>-1 and Cu<sub>22</sub>-2 is achieved with the help of density functional theory (DFT) calculations in Dmol<sup>3</sup> package<sup>1</sup>. The Perdew-Burke-Erzerhof (PBE)<sup>2,3</sup> functional

in the generalized gradient approximation (GGA) is applied in structural optimization. During the optimization process, the DFT semi-core pseudopotential approximation (DSPP)<sup>4</sup> and the DND<sup>5</sup> basis set including the *d* polarization function were used to deal with the inner electron and atomic orbitals of the cluster structure respectively. At the same time, Tkatchenko and Scheffler (TS)<sup>6</sup> dispersion correction is used in the optimization process. The convergence limits of the energy, energy gradient, and displacement of the geometric optimization are set to  $1.0 \times 10^{-5}$  Hartree,  $4.0 \times 10^{-3}$  Hartree/Å, and  $5.0 \times 10^{-3}$  Å, respectively.

The single point energies of two Cu<sub>22</sub> were calculated using DFT at the PBE0-D3(BJ)<sup>7, 8</sup>/def2-TZVP<sup>9</sup> level, as implemented in the ORCA5.0.3 program system<sup>10, 11</sup>. TDDFT calculation is implemented using the ORCA software package at the level of PBE0<sup>12</sup>/def2-SV(P)<sup>9</sup>. In addition, the solvent effect was considered with 1, 2-dichloroethane in the SMD model<sup>13</sup>. The number of excited states calculated for each cluster is 300.

In order to reflect the differences in the electronic structures of Cu<sub>22</sub>-1 and Cu<sub>22</sub>-2, all the above calculations use the overall structure (without any simplification). Since the number of atoms in the two clusters is very large, we use the density-fitting approximation method to speed up the calculation of single-point energy and TDDFT (the error introduced is negligible). The density fitting basis set used is def2/J<sup>14</sup> (corresponding to the def2-SV(P) and def2-TZVP basis set, respectively). In addition, the data processing of PDOS and UV-Vis is implemented based on the Multiwfn3.8(dev) software package<sup>15</sup>.

## Reference

1. Delley, B., From molecules to solids with the DMol<sup>3</sup> approach. *The Journal of Chemical Physics* **2000**, *113* (18), 7756-7764.
2. Perdew, J. P.; Burke, K.; Ernzerhof, M., Generalized Gradient Approximation Made Simple. *Physical Review Letters* **1996**, *77* (18), 3865-3868.
3. Perdew, J. P.; Burke, K.; Ernzerhof, M., Generalized Gradient Approximation Made Simple. *Physical Review Letters* **1997**, *78* (7), 1396-1396.
4. Delley, B., Hardness conserving semilocal pseudopotentials. *Physical Review B* **2002**, *66* (15), 155125.
5. Delley, B., Ground-State Enthalpies: Evaluation of Electronic Structure Approaches with Emphasis on the Density Functional Method. *The Journal of Physical Chemistry A* **2006**, *110* (50), 13632-13639.
6. Tkatchenko, A.; Scheffler, M., Accurate Molecular Van Der Waals Interactions from Ground-State Electron Density and Free-Atom Reference Data. *Physical Review Letters* **2009**, *102* (7), 073005.
7. Grimme, S.; Antony, J.; Ehrlich, S.; Krieg, H., A consistent and accurate ab initio parametrization of density functional dispersion correction (DFT-D) for the 94 elements H-Pu. *The Journal of Chemical Physics* **2010**, *132* (15), 154104.
8. Grimme, S.; Ehrlich, S.; Goerigk, L., Effect of the damping function in dispersion corrected density functional theory. *Journal of Computational Chemistry* **2011**, *32* (7), 1456-1465.
9. Weigend, F.; Ahlrichs, R., Balanced basis sets of split valence, triple zeta valence and quadruple zeta valence quality for H to Rn: Design and assessment of accuracy. *Physical Chemistry Chemical Physics* **2005**, *7* (18), 3297-3305.
10. Neese, F., The ORCA program system. *WIREs Computational Molecular Science* **2012**, *2* (1), 73-78.
11. Neese, F., Software update: the ORCA program system, version 4.0. *WIREs Computational Molecular Science* **2018**, *8* (1), e1327.
12. Adamo, C.; Barone, V., Toward reliable density functional methods without adjustable parameters: The PBE0 model. *The Journal of Chemical Physics* **1999**, *110* (13), 6158-6170.

13. Marenich, A. V.; Cramer, C. J.; Truhlar, D. G., Universal Solvation Model Based on Solute Electron Density and on a Continuum Model of the Solvent Defined by the Bulk Dielectric Constant and Atomic Surface Tensions. *The Journal of Physical Chemistry B* **2009**, *113* (18), 6378-6396.
14. Weigend, F., Accurate Coulomb-fitting basis sets for H to Rn. *Physical Chemistry Chemical Physics* **2006**, *8* (9), 1057-1065.
15. Lu, T.; Chen, F., Multiwfn: A multifunctional wavefunction analyzer. *Journal of Computational Chemistry* **2012**, *33* (5), 580-592.

### 1.6 Two isomeric Cu<sub>22</sub>-1 and Cu<sub>22</sub>-2 catalyzed [3+2] azide-alkyne cycloaddition (AAC, click reaction).

Details of the catalytic procedure: Two separate 10 ml vials were chosen. The first vial was charged with Cu<sub>22</sub>-1 (0.06 mol%), benzyl azide (0.25 mmol, 1.0 equiv.), and phenylacetylene (0.3 mmol, 1.2 equiv.). The second vial was charged with Cu<sub>22</sub>-2 (0.06 mol%), benzyl azide (0.25 mmol, 1.0 equiv.), and phenylacetylene (0.3 mmol, 1.2 equiv.). Acetonitrile (2 ml) were added to both vials under a nitrogen atmosphere. The reaction mixtures were then irradiated with blue light (10-W blue light-emitting diode lamps). A cooling fan was used to maintain the reaction at room temperature, 28-30 °C) under N<sub>2</sub> (1 atm). A GC sample was taken from each vial and subjected to GC analysis to determine the product yield. All reactions were conducted under a nitrogen atmosphere in oven-dried glassware.

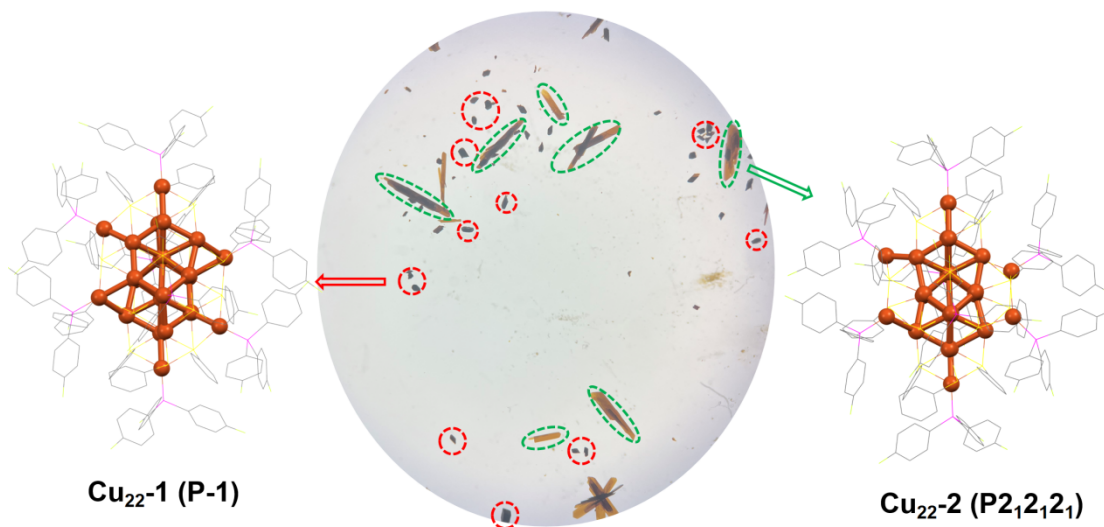

**Figure S1.** The digital photos of Cu<sub>22</sub> nanoclusters.

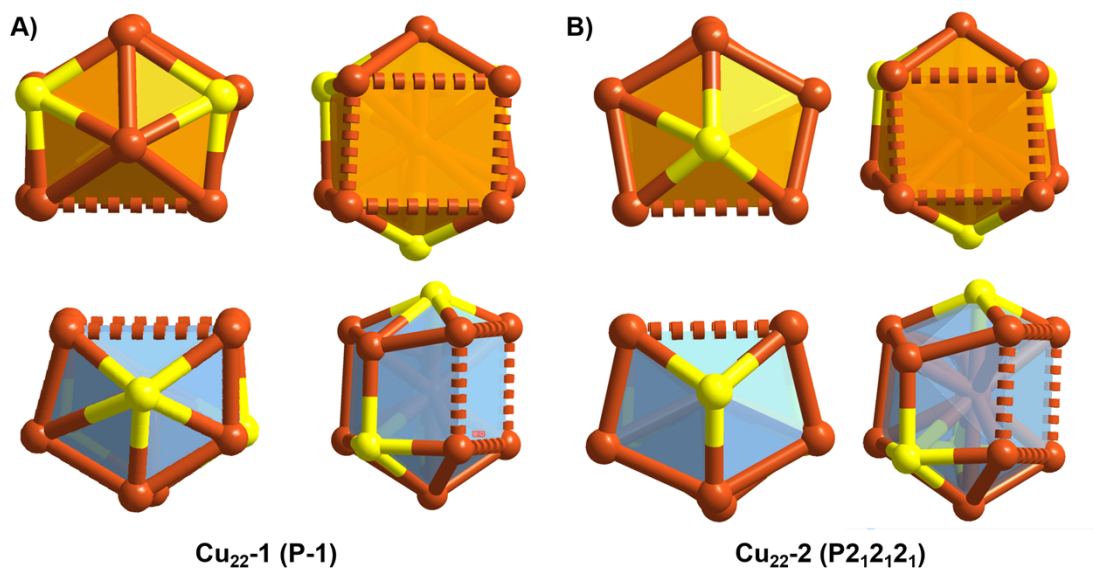

Figure S2. The two distorted Ino decahedron Cu<sub>10</sub>Se<sub>3</sub> units.

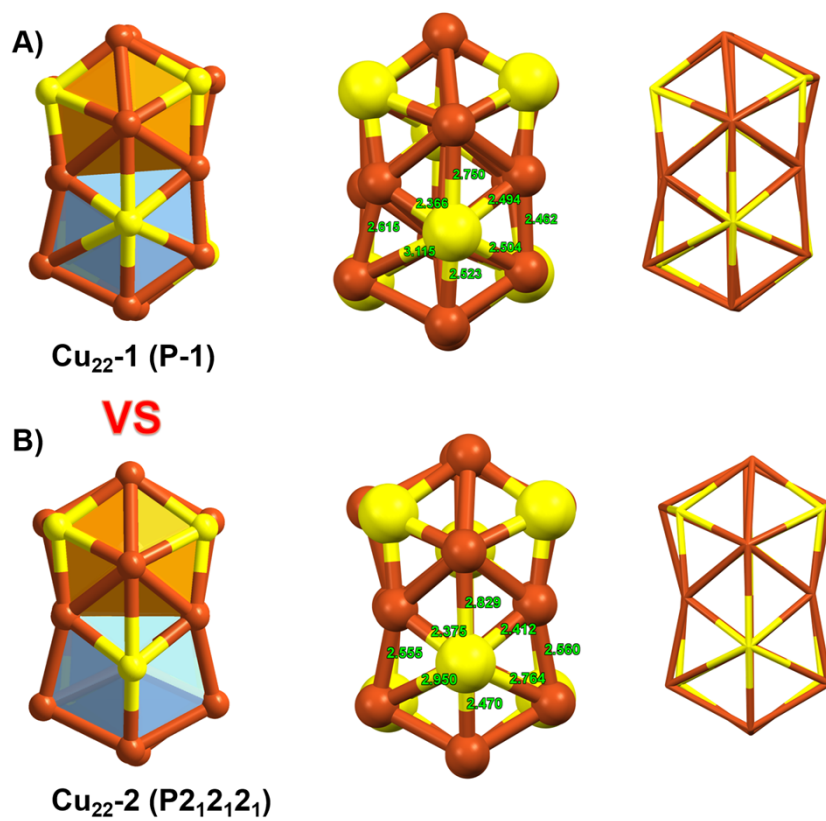

Figure S3. The comparison of two Cu<sub>16</sub>Se<sub>6</sub> units of Cu<sub>22</sub>-1 and Cu<sub>22</sub>-2.

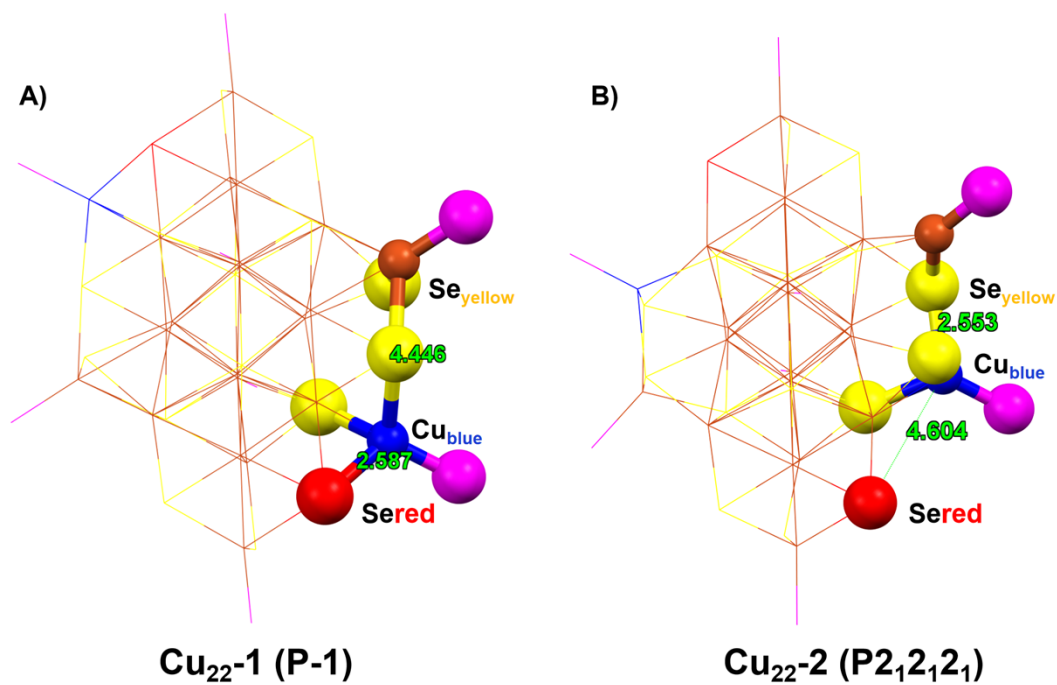

Figure S4. The detail comparison of bond distance of Cu<sub>blue</sub>-Se<sub>red</sub> and bond distance of Cu<sub>blue</sub>-Se<sub>yellow</sub>.

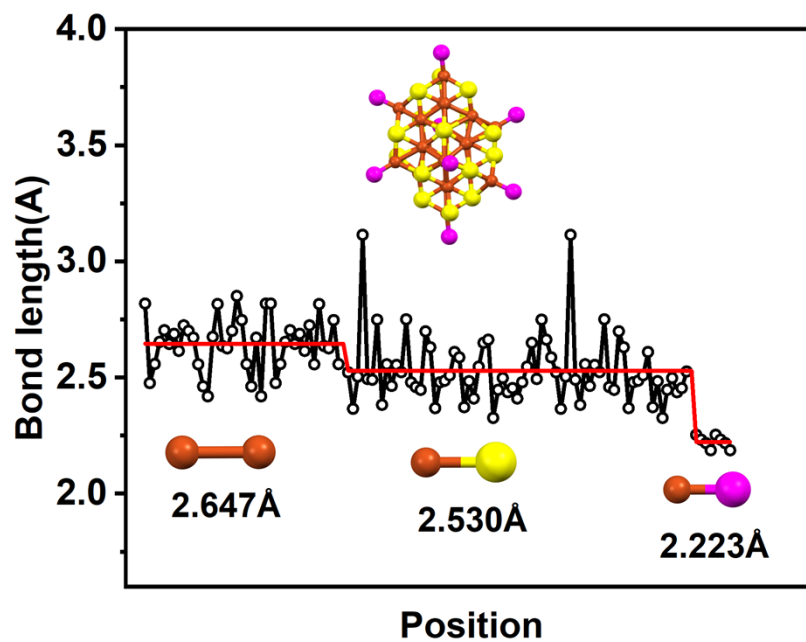

Figure S5. Bond lengths of the Cu<sub>22</sub>-1 nanocluster.

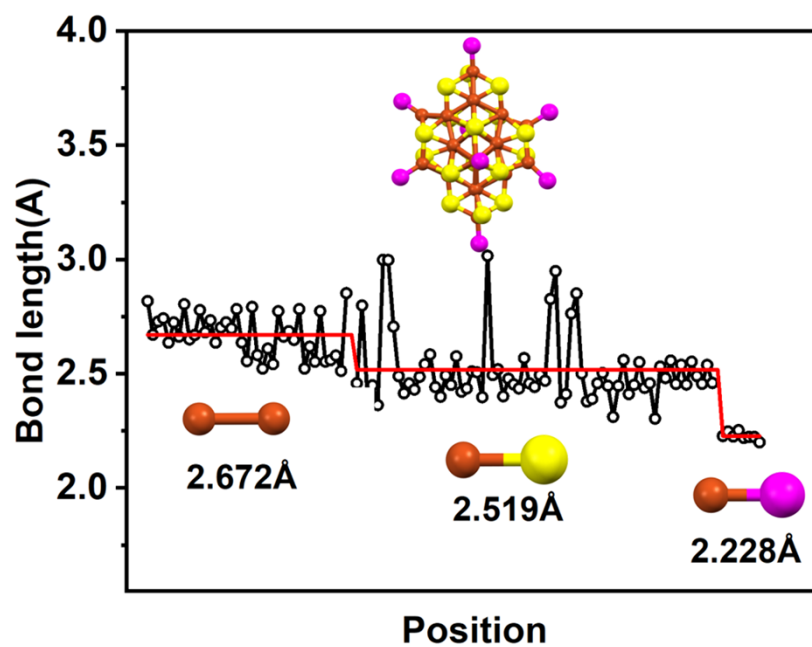

Figure S6. Bond lengths of the  $\text{Cu}_{22-2}$  nanocluster.

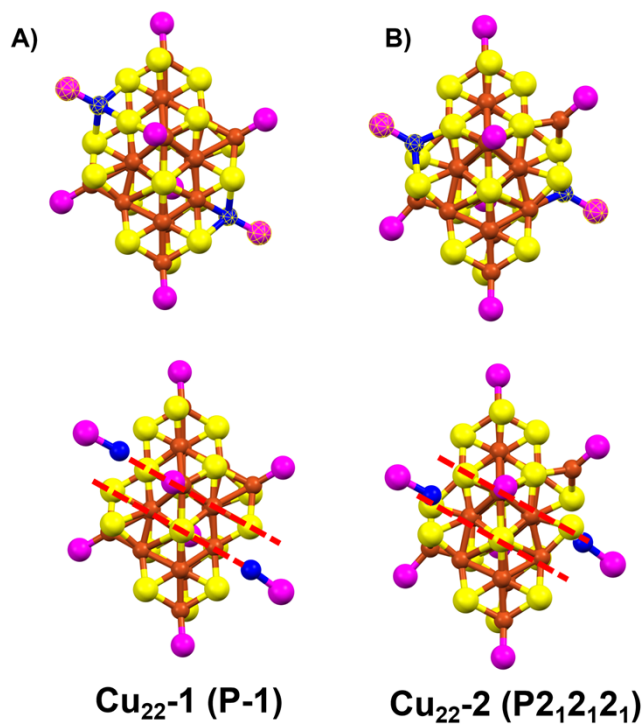

Figure S7. Differences in bonding modes between surface Cu-P ligands and the overall framework.

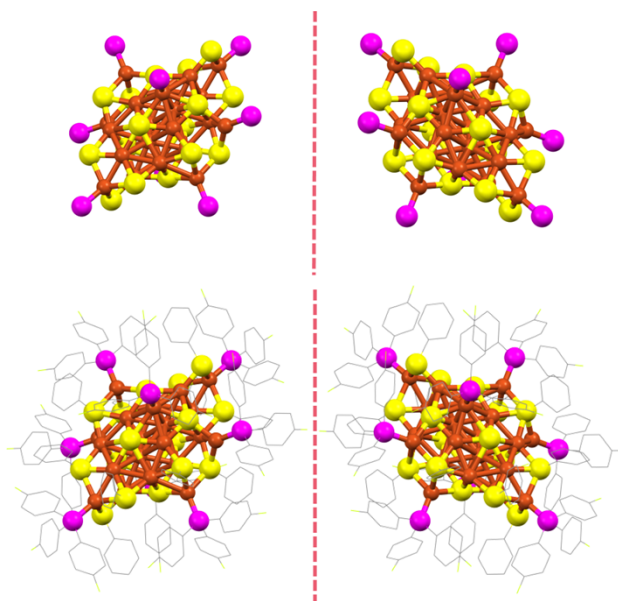

**Figure S8.** The enantiomers in the crystal unit cell of  $\text{Cu}_{22}\text{-2}$  ( $P2_12_12_1$ ).

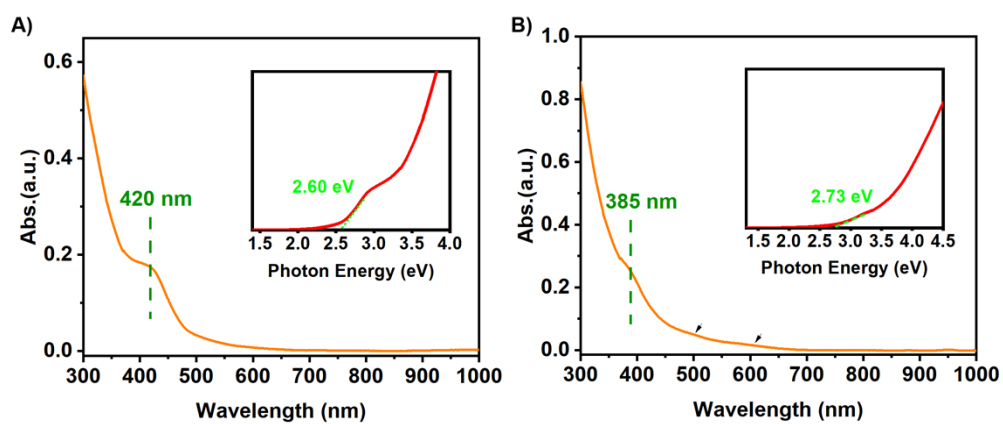

**Figure S9.** Optical absorption spectra and the spectra on the energy scale of A)  $\text{Cu}_{22}\text{-1}$  and B)  $\text{Cu}_{22}\text{-2}$ .

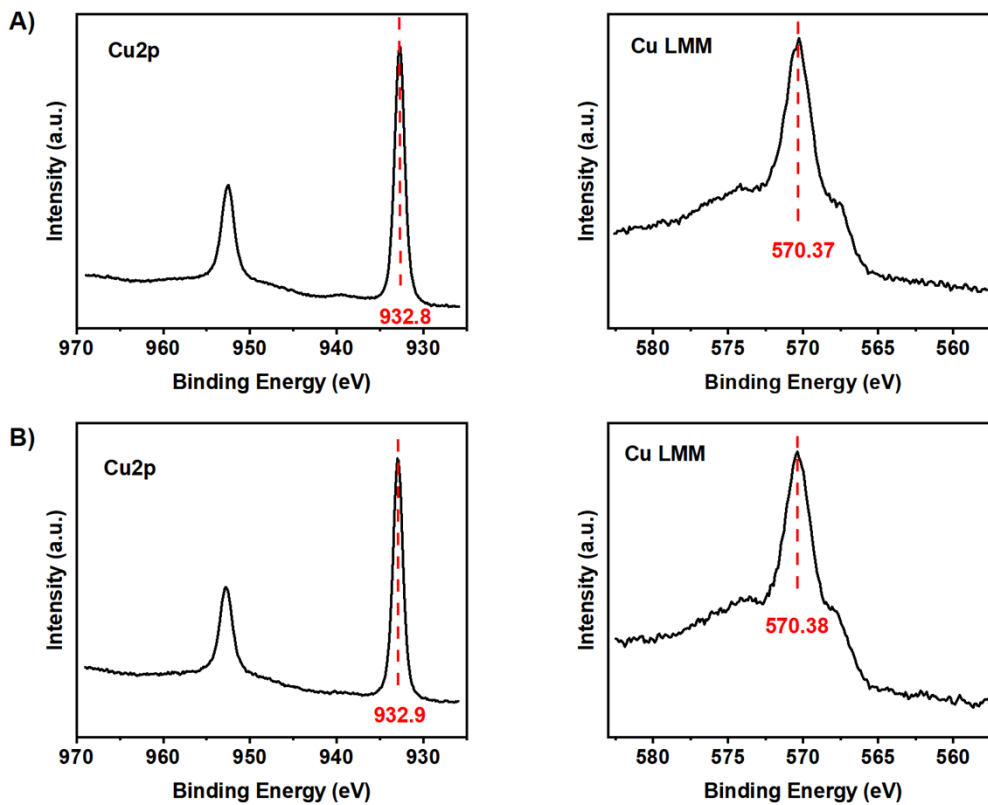

**Figure S10.** the XPS data of  $\text{Cu}2p$  and the  $\text{Cu LMM}$  spectra for A)  $\text{Cu}_{22-1}$  nanocluster and B)  $\text{Cu}_{22-2}$  nanocluster.

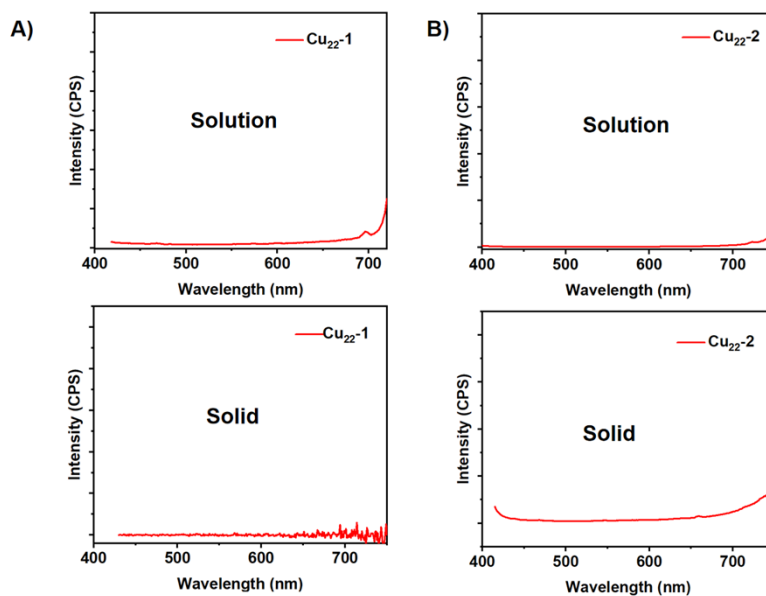

**Figure S11.** Emission Spectra of (A)  $\text{Cu}_{22-1}$  and (B)  $\text{Cu}_{22-2}$  in solution and solid states.



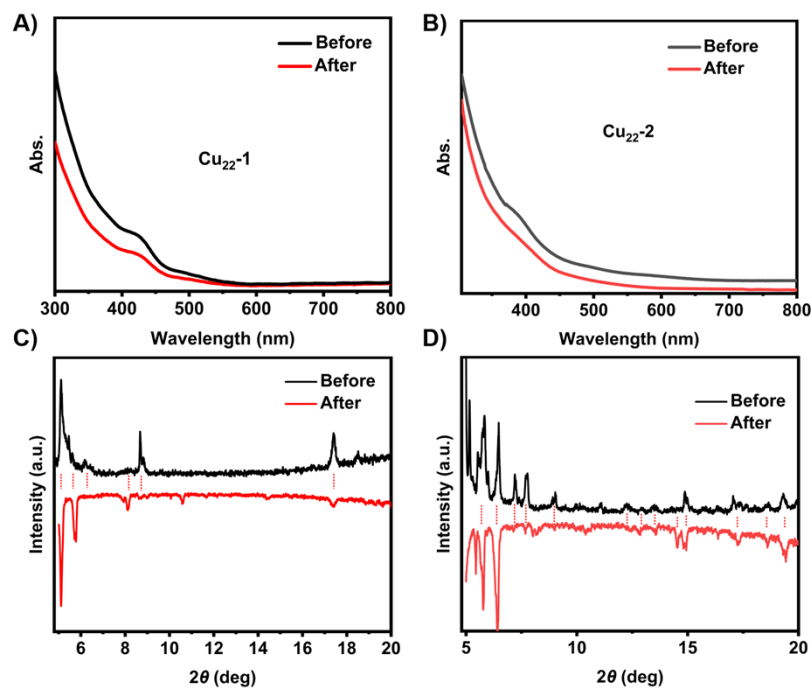

Figure S12. Stability test before and after catalysis. UV-vis spectra of (A) **Cu<sub>22</sub>-1** and (B) **Cu<sub>22</sub>-2** before and after catalysis. P-XRD spectra of (C) **Cu<sub>22</sub>-1** and (D) **Cu<sub>22</sub>-2** before and after catalysis.

**Table S1. Crystal data and structure refinement for Cu<sub>22</sub>-1.**

|                     |                                                                                                                    |
|---------------------|--------------------------------------------------------------------------------------------------------------------|
| Identification code | ZHM-Cu <sub>22</sub> -1                                                                                            |
| Empirical formula   | C <sub>206</sub> H <sub>150</sub> Cl <sub>4</sub> Cu <sub>22</sub> F <sub>24</sub> P <sub>8</sub> Se <sub>16</sub> |
| Formula weight      | 6132.84                                                                                                            |
| Temperature/K       | 120                                                                                                                |
| Crystal system      | triclinic                                                                                                          |
| Space group         | P-1                                                                                                                |
| a/Å                 | 17.7264(14)                                                                                                        |

|                                                |                                                                |
|------------------------------------------------|----------------------------------------------------------------|
| b/Å                                            | 19.5316(15)                                                    |
| c/Å                                            | 19.7763(13)                                                    |
| $\alpha/^\circ$                                | 117.328(5)                                                     |
| $\beta/^\circ$                                 | 103.867(6)                                                     |
| $\gamma/^\circ$                                | 98.797(6)                                                      |
| Volume/Å <sup>3</sup>                          | 5624.4(8)                                                      |
| Z                                              | 1                                                              |
| Radiation                                      | CuK $\alpha$ ( $\lambda = 1.54186$ )                           |
| 2 $\Theta$ range for data collection/ $^\circ$ | 7.732 to 138.922                                               |
| Index ranges                                   | $-18 \leq h \leq 21, -23 \leq k \leq 13, -19 \leq l \leq 24$   |
| Reflections collected                          | 51756                                                          |
| Independent reflections                        | 20107 [ $R_{\text{int}} = 0.0169, R_{\text{sigma}} = 0.0219$ ] |
| Data/restraints/parameters                     | 20107/0/1261                                                   |
| Goodness-of-fit on $F^2$                       | 1.031                                                          |
| Final R indexes [ $I \geq 2\sigma(I)$ ]        | $R_1 = 0.0276, wR_2 = 0.0693$                                  |
| Final R indexes [all data]                     | $R_1 = 0.0331, wR_2 = 0.0712$                                  |
| Largest diff. peak/hole / e Å <sup>-3</sup>    | 1.47/-1.21                                                     |

**Table S2. Crystal data and structure refinement for Cu22-2.**

|                     |                                         |
|---------------------|-----------------------------------------|
| Identification code | ZHM-Cu22-2                              |
| Empirical formula   | $C_{204}H_{146}Cu_{22}F_{24}P_8Se_{16}$ |
| Formula weight      | 5966.01                                 |
| Temperature/K       | 120                                     |
| Crystal system      | orthorhombic                            |
| Space group         | $P2_12_12_1$                            |
| a/Å                 | 20.2077(6)                              |

|                                                |                                                                |
|------------------------------------------------|----------------------------------------------------------------|
| b/Å                                            | 29.3716(9)                                                     |
| c/Å                                            | 36.4328(12)                                                    |
| $\alpha/^\circ$                                | 90                                                             |
| $\beta/^\circ$                                 | 90                                                             |
| $\gamma/^\circ$                                | 90                                                             |
| Volume/Å <sup>3</sup>                          | 21624.1(12)                                                    |
| Z                                              | 4                                                              |
| Radiation                                      | CuK $\alpha$ ( $\lambda = 1.54186$ )                           |
| 2 $\Theta$ range for data collection/ $^\circ$ | 11.688 to 139.118                                              |
| Index ranges                                   | $-10 \leq h \leq 24, -33 \leq k \leq 35, -35 \leq l \leq 44$   |
| Reflections collected                          | 94001                                                          |
| Independent reflections                        | 37042 [ $R_{\text{int}} = 0.0437, R_{\text{sigma}} = 0.0595$ ] |
| Data/restraints/parameters                     | 37042/5676/2465                                                |
| Goodness-of-fit on $F^2$                       | 1.067                                                          |
| Final R indexes [ $I \geq 2\sigma(I)$ ]        | $R_1 = 0.0677, wR_2 = 0.1697$                                  |
| Final R indexes [all data]                     | $R_1 = 0.0757, wR_2 = 0.1737$                                  |
| Largest diff. peak/hole / e Å <sup>-3</sup>    | 1.37/-0.87                                                     |
| Flack parameter                                | 0.477(13)                                                      |

**Table S3. Elemental C, H contents measured by elemental analysis.**

|                     | Elemental analysis  |                     |
|---------------------|---------------------|---------------------|
|                     | Cal.                | Exp.                |
| Cu <sub>22</sub> -1 | C: 53.68%; H: 3.22% | C: 53.80%; H: 3.24% |
| Cu <sub>22</sub> -2 | C: 53.68%; H: 3.22% | C: 53.60%; H: 3.25% |

**Table S4. The attribution of the theoretically simulated UV-Vis absorption peak of Cu<sub>22</sub>-1.**

| <b>Cu<sub>22</sub>-1</b> | □                    | □                    | □                      | □                                |
|--------------------------|----------------------|----------------------|------------------------|----------------------------------|
| <b>peak</b>              | <b>wavelength/nm</b> | <b>Excited state</b> | <b>Transition mode</b> | <b>Transition contribution/%</b> |
| <i><b>α</b></i>          | 605                  | 1                    | H→L                    | 66.6                             |
|                          |                      |                      | H-1→L                  | 31.2                             |
|                          |                      | 2                    | H-1→L                  | 66.2                             |
|                          |                      |                      | H→L                    | 31.0                             |
| <i><b>β</b></i>          | 485                  | 5                    | H-5→L                  | 88.2                             |
| <i><b>γ</b></i>          | 418                  | 15                   | H→L+2                  | 53.8                             |
|                          |                      |                      | H-11→L                 | 13.1                             |
|                          |                      | 16                   | H-1→L+2                | 64.7                             |
| <i><b>δ</b></i>          | 366                  | 30                   | H-17→L                 | 35.6                             |
|                          |                      |                      | H-14→L                 | 11.5                             |
|                          |                      |                      | H-1→L+4                | 11.2                             |
|                          |                      | 37                   | H-5→L+1                | 72.3                             |
|                          |                      | 56                   | H-1→L+13               | 25.7                             |
|                          |                      |                      | H→L+15                 | 14.5                             |
|                          |                      | 57                   | H-1→L+14               | 25.5                             |
|                          |                      |                      | H→L+14                 | 20.8                             |
| □                        | □                    | □                    | H-1→L+11               | 11.2                             |

**Table S5. The attribution of the theoretically simulated UV-Vis absorption peak of Cu<sub>22</sub>-2.**

| <b>Cu<sub>22</sub>-2</b> | □                    | □                    | □                      | □                                |
|--------------------------|----------------------|----------------------|------------------------|----------------------------------|
| <b>peak</b>              | <b>wavelength/nm</b> | <b>Excited state</b> | <b>Transition mode</b> | <b>Transition contribution/%</b> |
| <i><b>α</b></i>          | 623                  | 1                    | H→L                    | 69.4                             |
|                          |                      |                      | H-1→L                  | 28.4                             |
|                          |                      | 2                    | H-1→L                  | 69.2                             |

|          |     |    |         |      |
|----------|-----|----|---------|------|
|          |     |    | H→L     | 28.1 |
| $\beta$  | 499 | 5  | H-4→L   | 80.0 |
|          |     | 6  | H-8→L   | 31.0 |
|          |     |    | H-9→L   | 22.0 |
|          |     |    | H-6→L   | 19.5 |
|          |     |    | H-7→L   | 12.2 |
|          |     | 7  | H-7→L   | 54.5 |
|          |     |    | H-8→L   | 16.1 |
|          |     |    | H-5→L   | 10.7 |
| $\gamma$ | 402 | 19 | H-13→L  | 22.4 |
|          |     |    | H-2→L+1 | 16.6 |
|          |     |    | H→L+2   | 13.1 |
|          |     | 21 | H-3→L+1 | 43.1 |
|          |     | 22 | H-1→L+2 | 36.5 |
|          |     |    | H-1→L+4 | 17.0 |
| $\delta$ | 367 | 36 | H-7→L+1 | 12.2 |
|          |     | 37 | H-7→L+1 | 19.3 |
|          |     | 41 | H-20→L  | 22.9 |
|          |     |    | H-1→L+3 | 10.0 |
|          |     | 42 | H→L+8   | 10.2 |
|          |     | 47 | H-6→L+1 | 25.7 |
|          |     |    | H-19→L  | 14.6 |
|          |     | 48 | H→L+12  | 13.0 |
|          |     | 50 | H→L+12  | 15.6 |
|          |     |    | H-1→L+7 | 13.2 |
|          |     | 53 | H-21→L  | 12.4 |
|          |     | 55 | H→L+13  | 16.4 |

|          |     |    |           |      |
|----------|-----|----|-----------|------|
|          |     |    | H-1 → L+9 | 14.7 |
| $\theta$ | 442 | 12 | H-10 → L  | 42.0 |
|          |     |    | H-13 → L  | 18.1 |
|          |     | 14 | H-12 → L  | 36.4 |
|          |     |    | H-10 → L  | 19.9 |
| □        | □   | □  | H-11 → L  | 16.8 |

**Table S6.** The catalytic performance of two isomeric **Cu<sub>22</sub>-1** and **Cu<sub>22</sub>-2**. [3+2] Cycloaddition between benzyl azide and phenylacetylene using isomeric **Cu<sub>22</sub>-1** and **Cu<sub>22</sub>-2** as catalyst under 50 °C oil bath.<sup>[a]</sup> Our study found that **Cu<sub>22</sub>-1**'s catalytic activity stabilized at about 92% after 24 hours. Therefore, we also ended the reaction with **Cu<sub>22</sub>-2** at the 24-hour mark to keep conditions consistent for comparison. This method allowed us to directly compare the catalytic performance of **Cu<sub>22</sub>-1** and **Cu<sub>22</sub>-2**. The similar catalytic effects suggest that the nanoclusters remain stable during the reaction.

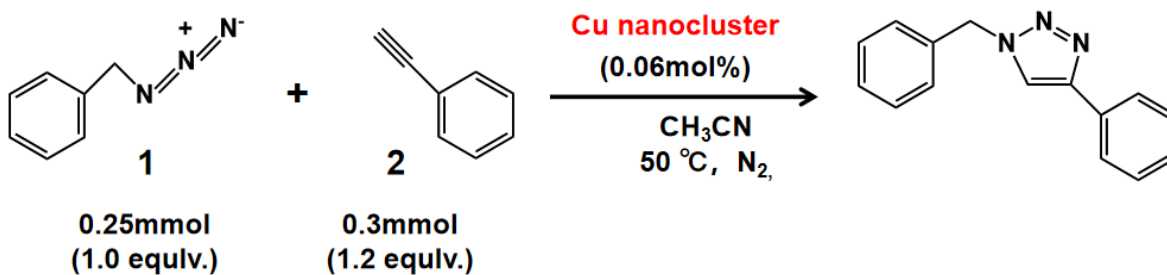

| Catalyst[b]              | The product yield determined by GC-MS (%) |                                     |
|--------------------------|-------------------------------------------|-------------------------------------|
|                          | Cycle 1                                   | Cycle 2                             |
| <b>Cu<sub>22</sub>-1</b> | <b>92 (24h); 80 (18h); 64 (12h)</b>       | <b>89 (24h); 76 (18h); 60 (12h)</b> |
| <b>Cu<sub>22</sub>-2</b> | <b>36(24h); 35 (18h); 32 (12h)</b>        | <b>33(24h); 32 (18h); 30 (12h)</b>  |

[a] benzyl azide (0.25 mmol, 1.0 equiv.), phenylacetylene (0.3 mmol, 1.2 equiv.) and acetonitrile (2 mL). [b] With respect to the amount of benzyl azide.
